# Supplementary material
Source: MDPI journal article supplement (https://www.mdpi.com/2227-9091/9/8/140)
Supplement: s1 [file s1]

### Supplementary material 3: Row column cross tabulations and correlation matrix tables

Tables 3.1–3.4 show row and column crosstabulations of incentivized revealed risk preferences ‘risk’ against perceived willingness to take financial risk in percentages and respective absolute figures. Figures on the shaded diagonal represent subjects who precisely predict their preferences from the two methods used to elicit risk preferences.

Table 3.1: cross tabulation PWTFR versus IRRP: all subjects

| risk  | risk perception |       |       |       |       |       |       |       |      |       | Total |
|-------|-----------------|-------|-------|-------|-------|-------|-------|-------|------|-------|-------|
|       | 1               | 2     | 3     | 4     | 5     | 6     | 7     | 8     | 9    | 10    |       |
| 1     | 19              | 2     | 7     | 11    | 7     | 11    | 0     | 2     | 2    | 13    | 74    |
|       | 25.68           | 2.7   | 9.46  | 14.86 | 9.46  | 14.86 | 0     | 2.7   | 2.7  | 17.57 | 100   |
|       | 10.11           | 6.25  | 6.48  | 13.75 | 6.48  | 9.48  | 0     | 8.33  | 10   | 19.12 | 9.59  |
| 2     | 7               | 1     | 4     | 4     | 5     | 7     | 0     | 0     | 0    | 2     | 30    |
|       | 23.33           | 3.33  | 13.33 | 13.33 | 16.67 | 23.33 | 0     | 0     | 0    | 6.67  | 100   |
|       | 3.72            | 3.13  | 3.7   | 5     | 4.63  | 6.03  | 0     | 0     | 0    | 2.94  | 3.89  |
| 3     | 20              | 7     | 9     | 7     | 8     | 24    | 0     | 3     | 1    | 5     | 84    |
|       | 23.81           | 8.33  | 10.71 | 8.33  | 9.52  | 28.57 | 0     | 3.57  | 1.19 | 5.95  | 100   |
|       | 10.64           | 21.88 | 8.33  | 8.75  | 7.41  | 20.69 | 0     | 12.5  | 5    | 7.35  | 10.88 |
| 4     | 45              | 6     | 28    | 16    | 36    | 34    | 12    | 4     | 3    | 18    | 202   |
|       | 22.28           | 2.97  | 13.86 | 7.92  | 17.82 | 16.83 | 5.94  | 1.98  | 1.49 | 8.91  | 100   |
|       | 23.94           | 18.75 | 25.93 | 20    | 33.33 | 29.31 | 42.86 | 16.67 | 15   | 26.47 | 26.17 |
| 5     | 29              | 6     | 25    | 15    | 30    | 25    | 8     | 6     | 5    | 12    | 161   |
|       | 18.01           | 3.73  | 15.53 | 9.32  | 18.63 | 15.53 | 4.97  | 3.73  | 3.11 | 7.45  | 100   |
|       | 15.43           | 18.75 | 23.15 | 18.75 | 27.78 | 21.55 | 28.57 | 25    | 25   | 17.65 | 20.85 |
| 6     | 29              | 4     | 12    | 13    | 18    | 8     | 5     | 1     | 1    | 9     | 100   |
|       | 29              | 4     | 12    | 13    | 18    | 8     | 5     | 1     | 1    | 9     | 100   |
|       | 15.43           | 12.5  | 11.11 | 16.25 | 16.67 | 6.9   | 17.86 | 4.17  | 5    | 13.24 | 12.95 |
| 7     | 13              | 2     | 9     | 7     | 3     | 5     | 2     | 3     | 2    | 0     | 46    |
|       | 28.26           | 4.35  | 19.57 | 15.22 | 6.52  | 10.87 | 4.35  | 6.52  | 4.35 | 0     | 100   |
|       | 6.91            | 6.25  | 8.33  | 8.75  | 2.78  | 4.31  | 7.14  | 12.5  | 10   | 0     | 5.96  |
| 8     | 4               | 1     | 1     | 2     | 0     | 0     | 0     | 0     | 1    | 1     | 10    |
|       | 40              | 10    | 10    | 20    | 0     | 0     | 0     | 0     | 10   | 10    | 100   |
|       | 2.13            | 3.13  | 0.93  | 2.5   | 0     | 0     | 0     | 0     | 5    | 1.47  | 1.3   |
| 9     | 10              | 3     | 1     | 1     | 1     | 0     | 0     | 0     | 5    | 4     | 25    |
|       | 40              | 12    | 4     | 4     | 4     | 0     | 0     | 0     | 20   | 16    | 100   |
|       | 5.32            | 9.38  | 0.93  | 1.25  | 0.93  | 0     | 0     | 0     | 25   | 5.88  | 3.24  |
| 10    | 12              | 0     | 12    | 4     | 0     | 2     | 1     | 5     | 0    | 4     | 40    |
|       | 30              | 0     | 30    | 10    | 0     | 5     | 2.5   | 12.5  | 0    | 10    | 100   |
|       | 6.38            | 0     | 11.11 | 5     | 0     | 1.72  | 3.57  | 20.83 | 0    | 5.88  | 5.18  |
| Total | 188             | 32    | 108   | 80    | 108   | 116   | 28    | 24    | 20   | 68    | 772   |
|       | 24.35           | 4.15  | 13.99 | 10.36 | 13.99 | 15.03 | 3.63  | 3.11  | 2.59 | 8.81  | 100   |
|       | 100             | 100   | 100   | 100   | 100   | 100   | 100   | 100   | 100  | 100   | 100   |

Table 3.2: cross tabulation PWTFR versus IRRP: male subjects

|       |       |       |       |       | risk_perception |       |      |      |       |       |       |
|-------|-------|-------|-------|-------|-----------------|-------|------|------|-------|-------|-------|
| risk  | 1     | 2     | 3     | 4     | 5               | 6     | 7    | 8    | 9     | 10    | Total |
| 1     | 6     | 2     | 4     | 6     | 2               | 10    | 0    | 0    | 2     | 6     | 38    |
|       | 15.79 | 5.26  | 10.53 | 15.79 | 5.26            | 26.32 | 0    | 0    | 5.26  | 15.79 | 100   |
|       | 5.77  | 8.33  | 12.5  | 12.5  | 4.55            | 20.83 | 0    | 0    | 25    | 21.43 | 10.56 |
| 2     | 6     | 1     | 1     | 2     | 1               | 1     | 0    | 0    | 0     | 1     | 13    |
|       | 46.15 | 7.69  | 7.69  | 15.38 | 7.69            | 7.69  | 0    | 0    | 0     | 7.69  | 100   |
|       | 5.77  | 4.17  | 3.13  | 4.17  | 2.27            | 2.08  | 0    | 0    | 0     | 3.57  | 3.61  |
| 3     | 14    | 5     | 5     | 6     | 3               | 7     | 0    | 0    | 0     | 1     | 41    |
|       | 34.15 | 12.2  | 12.2  | 14.63 | 7.32            | 17.07 | 0    | 0    | 0     | 2.44  | 100   |
|       | 13.46 | 20.83 | 15.63 | 12.5  | 6.82            | 14.58 | 0    | 0    | 0     | 3.57  | 11.39 |
| 4     | 28    | 4     | 6     | 9     | 18              | 12    | 9    | 0    | 0     | 7     | 93    |
|       | 30.11 | 4.3   | 6.45  | 9.68  | 19.35           | 12.9  | 9.68 | 0    | 0     | 7.53  | 100   |
|       | 26.92 | 16.67 | 18.75 | 18.75 | 40.91           | 25    | 45   | 0    | 0     | 25    | 25.83 |
| 5     | 19    | 4     | 4     | 10    | 14              | 12    | 6    | 3    | 1     | 5     | 78    |
|       | 24.36 | 5.13  | 5.13  | 12.82 | 17.95           | 15.38 | 7.69 | 3.85 | 1.28  | 6.41  | 100   |
|       | 18.27 | 16.67 | 12.5  | 20.83 | 31.82           | 25    | 30   | 75   | 12.5  | 17.86 | 21.67 |
| 6     | 16    | 3     | 3     | 9     | 5               | 5     | 4    | 0    | 1     | 3     | 49    |
|       | 32.65 | 6.12  | 6.12  | 18.37 | 10.2            | 10.2  | 8.16 | 0    | 2.04  | 6.12  | 100   |
|       | 15.38 | 12.5  | 9.38  | 18.75 | 11.36           | 10.42 | 20   | 0    | 12.5  | 10.71 | 13.61 |
| 7     | 5     | 2     | 1     | 5     | 1               | 0     | 1    | 1    | 2     | 0     | 18    |
|       | 27.78 | 11.11 | 5.56  | 27.78 | 5.56            | 0     | 5.56 | 5.56 | 11.11 | 0     | 100   |
|       | 4.81  | 8.33  | 3.13  | 10.42 | 2.27            | 0     | 5    | 25   | 25    | 0     | 5     |
| 8     | 1     | 0     | 1     | 1     | 0               | 0     | 0    | 0    | 1     | 1     | 5     |
|       | 20    | 0     | 20    | 20    | 0               | 0     | 0    | 0    | 20    | 20    | 100   |
|       | 0.96  | 0     | 3.13  | 2.08  | 0               | 0     | 0    | 0    | 12.5  | 3.57  | 1.39  |
| 9     | 5     | 3     | 0     | 0     | 0               | 0     | 0    | 0    | 1     | 0     | 9     |
|       | 55.56 | 33.33 | 0     | 0     | 0               | 0     | 0    | 0    | 11.11 | 0     | 100   |
|       | 4.81  | 12.5  | 0     | 0     | 0               | 0     | 0    | 0    | 12.5  | 0     | 2.5   |
| 10    | 4     | 0     | 7     | 0     | 0               | 1     | 0    | 0    | 0     | 4     | 16    |
|       | 25    | 0     | 43.75 | 0     | 0               | 6.25  | 0    | 0    | 0     | 25    | 100   |
|       | 3.85  | 0     | 21.88 | 0     | 0               | 2.08  | 0    | 0    | 0     | 14.29 | 4.44  |
| Total | 104   | 24    | 32    | 48    | 44              | 48    | 20   | 4    | 8     | 28    | 360   |
|       | 28.89 | 6.67  | 8.89  | 13.33 | 12.22           | 13.33 | 5.56 | 1.11 | 2.22  | 7.78  | 100   |
|       | 100   | 100   | 100   | 100   | 100             | 100   | 100  | 100  | 100   | 100   | 100   |

Table 3.3: cross tabulation PWTFR versus IRRP: female subjects

|       |       |      |       |       | risk_per |       |      |       |       |       |       |
|-------|-------|------|-------|-------|----------|-------|------|-------|-------|-------|-------|
| risk  | 1     | 2    | 3     | 4     | 5        | 6     | 7    | 8     | 9     | 10    | Total |
| 1     | 13    | 0    | 3     | 2     | 5        | 1     | 0    | 2     | 0     | 7     | 33    |
|       | 39.39 | 0    | 9.09  | 6.06  | 15.15    | 3.03  | 0    | 6.06  | 0     | 21.21 | 100   |
|       | 16.25 | 0    | 3.95  | 7.14  | 7.81     | 1.47  | 0    | 10    | 0     | 17.5  | 8.17  |
| 2     | 1     | 0    | 3     | 2     | 4        | 6     | 0    | 0     | 0     | 1     | 17    |
|       | 5.88  | 0    | 17.65 | 11.76 | 23.53    | 35.29 | 0    | 0     | 0     | 5.88  | 100   |
|       | 1.25  | 0    | 3.95  | 7.14  | 6.25     | 8.82  | 0    | 0     | 0     | 2.5   | 4.21  |
| 3     | 6     | 2    | 4     | 1     | 5        | 17    | 0    | 3     | 1     | 4     | 43    |
|       | 13.95 | 4.65 | 9.3   | 2.33  | 11.63    | 39.53 | 0    | 6.98  | 2.33  | 9.3   | 100   |
|       | 7.5   | 25   | 5.26  | 3.57  | 7.81     | 25    | 0    | 15    | 8.33  | 10    | 10.64 |
| 4     | 17    | 2    | 22    | 7     | 18       | 22    | 3    | 4     | 3     | 11    | 109   |
|       | 15.6  | 1.83 | 20.18 | 6.42  | 16.51    | 20.18 | 2.75 | 3.67  | 2.75  | 10.09 | 100   |
|       | 21.25 | 25   | 28.95 | 25    | 28.13    | 32.35 | 37.5 | 20    | 25    | 27.5  | 26.98 |
| 5     | 10    | 2    | 21    | 5     | 16       | 13    | 2    | 3     | 4     | 7     | 83    |
|       | 12.05 | 2.41 | 25.3  | 6.02  | 19.28    | 15.66 | 2.41 | 3.61  | 4.82  | 8.43  | 100   |
|       | 12.5  | 25   | 27.63 | 17.86 | 25       | 19.12 | 25   | 15    | 33.33 | 17.5  | 20.54 |
| 6     | 9     | 1    | 9     | 3     | 13       | 3     | 1    | 1     | 0     | 6     | 46    |
|       | 19.57 | 2.17 | 19.57 | 6.52  | 28.26    | 6.52  | 2.17 | 2.17  | 0     | 13.04 | 100   |
|       | 11.25 | 12.5 | 11.84 | 10.71 | 20.31    | 4.41  | 12.5 | 5     | 0     | 15    | 11.39 |
| 7     | 8     | 0    | 8     | 2     | 2        | 5     | 1    | 2     | 0     | 0     | 28    |
|       | 28.57 | 0    | 28.57 | 7.14  | 7.14     | 17.86 | 3.57 | 7.14  | 0     | 0     | 100   |
|       | 10    | 0    | 10.53 | 7.14  | 3.13     | 7.35  | 12.5 | 10    | 0     | 0     | 6.93  |
| 8     | 3     | 1    | 0     | 1     | 0        | 0     | 0    | 0     | 0     | 0     | 5     |
|       | 60    | 20   | 0     | 20    | 0        | 0     | 0    | 0     | 0     | 0     | 100   |
|       | 3.75  | 12.5 | 0     | 3.57  | 0        | 0     | 0    | 0     | 0     | 0     | 1.24  |
| 9     | 5     | 0    | 1     | 1     | 1        | 0     | 0    | 0     | 4     | 4     | 16    |
|       | 31.25 | 0    | 6.25  | 6.25  | 6.25     | 0     | 0    | 0     | 25    | 25    | 100   |
|       | 6.25  | 0    | 1.32  | 3.57  | 1.56     | 0     | 0    | 0     | 33.33 | 10    | 3.96  |
| 10    | 8     | 0    | 5     | 4     | 0        | 1     | 1    | 5     | 0     | 0     | 24    |
|       | 33.33 | 0    | 20.83 | 16.67 | 0        | 4.17  | 4.17 | 20.83 | 0     | 0     | 100   |
|       | 10    | 0    | 6.58  | 14.29 | 0        | 1.47  | 12.5 | 25    | 0     | 0     | 5.94  |
| Total | 80    | 8    | 76    | 28    | 64       | 68    | 8    | 20    | 12    | 40    | 404   |
|       | 19.8  | 1.98 | 18.81 | 6.93  | 15.84    | 16.83 | 1.98 | 4.95  | 2.97  | 9.9   | 100   |
|       | 100   | 100  | 100   | 100   | 100      | 100   | 100  | 100   | 100   | 100   | 100   |

Table 3.4: cross tabulation PWTFR versus IRRP: low financial literacy subjects

|       |       |       |       |       | risk_per high lit |       |      |       |      |       |       |
|-------|-------|-------|-------|-------|-------------------|-------|------|-------|------|-------|-------|
| risk  | 1     | 2     | 3     | 4     | 5                 | 6     | 7    | 8     | 9    | 10    | Total |
| 1     | 1     | 2     | 3     | 2     | 0                 | 4     | 0    | 0     | 0    | 6     | 18    |
|       | 5.56  | 11.11 | 16.67 | 11.11 | 0                 | 22.22 | 0    | 0     | 0    | 33.33 | 100   |
|       | 1.67  | 25    | 5     | 7.14  | 0                 | 6.67  | 0    | 0     | 0    | 37.5  | 5.77  |
| 2     | 1     | 1     | 1     | 2     | 1                 | 3     | 0    | 0     | 0    | 0     | 9     |
|       | 11.11 | 11.11 | 11.11 | 22.22 | 11.11             | 33.33 | 0    | 0     | 0    | 0     | 100   |
|       | 1.67  | 12.5  | 1.67  | 7.14  | 1.92              | 5     | 0    | 0     | 0    | 0     | 2.88  |
| 3     | 8     | 2     | 7     | 2     | 3                 | 12    | 0    | 0     | 1    | 1     | 36    |
|       | 22.22 | 5.56  | 19.44 | 5.56  | 8.33              | 33.33 | 0    | 0     | 2.78 | 2.78  | 100   |
|       | 13.33 | 25    | 11.67 | 7.14  | 5.77              | 20    | 0    | 0     | 12.5 | 6.25  | 11.54 |
| 4     | 14    | 2     | 19    | 2     | 16                | 17    | 3    | 2     | 1    | 4     | 80    |
|       | 17.5  | 2.5   | 23.75 | 2.5   | 20                | 21.25 | 3.75 | 2.5   | 1.25 | 5     | 100   |
|       | 23.33 | 25    | 31.67 | 7.14  | 30.77             | 28.33 | 37.5 | 16.67 | 12.5 | 25    | 25.64 |
| 5     | 11    | 1     | 15    | 8     | 18                | 16    | 3    | 3     | 3    | 3     | 81    |
|       | 13.58 | 1.23  | 18.52 | 9.88  | 22.22             | 19.75 | 3.7  | 3.7   | 3.7  | 3.7   | 100   |
|       | 18.33 | 12.5  | 25    | 28.57 | 34.62             | 26.67 | 37.5 | 25    | 37.5 | 18.75 | 25.96 |
| 6     | 11    | 0     | 8     | 5     | 13                | 5     | 2    | 0     | 0    | 2     | 46    |
|       | 23.91 | 0     | 17.39 | 10.87 | 28.26             | 10.87 | 4.35 | 0     | 0    | 4.35  | 100   |
|       | 18.33 | 0     | 13.33 | 17.86 | 25                | 8.33  | 25   | 0     | 0    | 12.5  | 14.74 |
| 7     | 4     | 0     | 3     | 2     | 0                 | 3     | 0    | 2     | 1    | 0     | 15    |
|       | 26.67 | 0     | 20    | 13.33 | 0                 | 20    | 0    | 13.33 | 6.67 | 0     | 100   |
|       | 6.67  | 0     | 5     | 7.14  | 0                 | 5     | 0    | 16.67 | 12.5 | 0     | 4.81  |
| 8     | 2     | 0     | 0     | 1     | 0                 | 0     | 0    | 0     | 1    | 0     | 4     |
|       | 50    | 0     | 0     | 25    | 0                 | 0     | 0    | 0     | 25   | 0     | 100   |
|       | 3.33  | 0     | 0     | 3.57  | 0                 | 0     | 0    | 0     | 12.5 | 0     | 1.28  |
| 9     | 1     | 0     | 1     | 0     | 1                 | 0     | 0    | 0     | 1    | 0     | 4     |
|       | 25    | 0     | 25    | 0     | 25                | 0     | 0    | 0     | 25   | 0     | 100   |
|       | 1.67  | 0     | 1.67  | 0     | 1.92              | 0     | 0    | 0     | 12.5 | 0     | 1.28  |
| 10    | 7     | 0     | 3     | 4     | 0                 | 0     | 0    | 5     | 0    | 0     | 19    |
|       | 36.84 | 0     | 15.79 | 21.05 | 0                 | 0     | 0    | 26.32 | 0    | 0     | 100   |
|       | 11.67 | 0     | 5     | 14.29 | 0                 | 0     | 0    | 41.67 | 0    | 0     | 6.09  |
| Total | 60    | 8     | 60    | 28    | 52                | 60    | 8    | 12    | 8    | 16    | 312   |
|       | 19.23 | 2.56  | 19.23 | 8.97  | 16.67             | 19.23 | 2.56 | 3.85  | 2.56 | 5.13  | 100   |
|       | 100   | 100   | 100   | 100   | 100               | 100   | 100  | 100   | 100  | 100   | 100   |

Table 3.5 : cross tabulation PWTFR versus IRRP: high financial literacy subjects

|       |       |       |       |       | risk_per |       |      |       |       |       |       |
|-------|-------|-------|-------|-------|----------|-------|------|-------|-------|-------|-------|
| risk  | 1     | 2     | 3     | 4     | 5        | 6     | 7    | 8     | 9     | 10    | Total |
| 1     | 18    | 0     | 4     | 9     | 7        | 7     | 0    | 2     | 2     | 7     | 56    |
|       | 32.14 | 0     | 7.14  | 16.07 | 12.5     | 12.5  | 0    | 3.57  | 3.57  | 12.5  | 100   |
|       | 14.06 | 0     | 8.33  | 17.31 | 12.5     | 12.5  | 0    | 16.67 | 16.67 | 13.46 | 12.17 |
| 2     | 6     | 0     | 3     | 2     | 4        | 4     | 0    | 0     | 0     | 2     | 21    |
|       | 28.57 | 0     | 14.29 | 9.52  | 19.05    | 19.05 | 0    | 0     | 0     | 9.52  | 100   |
|       | 4.69  | 0     | 6.25  | 3.85  | 7.14     | 7.14  | 0    | 0     | 0     | 3.85  | 4.57  |
| 3     | 12    | 5     | 2     | 5     | 5        | 12    | 0    | 3     | 0     | 4     | 48    |
|       | 25    | 10.42 | 4.17  | 10.42 | 10.42    | 25    | 0    | 6.25  | 0     | 8.33  | 100   |
|       | 9.38  | 20.83 | 4.17  | 9.62  | 8.93     | 21.43 | 0    | 25    | 0     | 7.69  | 10.43 |
| 4     | 31    | 4     | 9     | 14    | 20       | 17    | 9    | 2     | 2     | 14    | 122   |
|       | 25.41 | 3.28  | 7.38  | 11.48 | 16.39    | 13.93 | 7.38 | 1.64  | 1.64  | 11.48 | 100   |
|       | 24.22 | 16.67 | 18.75 | 26.92 | 35.71    | 30.36 | 45   | 16.67 | 16.67 | 26.92 | 26.52 |
| 5     | 18    | 5     | 10    | 7     | 12       | 9     | 5    | 3     | 2     | 9     | 80    |
|       | 22.5  | 6.25  | 12.5  | 8.75  | 15       | 11.25 | 6.25 | 3.75  | 2.5   | 11.25 | 100   |
|       | 14.06 | 20.83 | 20.83 | 13.46 | 21.43    | 16.07 | 25   | 25    | 16.67 | 17.31 | 17.39 |
| 6     | 18    | 4     | 4     | 8     | 5        | 3     | 3    | 1     | 1     | 7     | 54    |
|       | 33.33 | 7.41  | 7.41  | 14.81 | 9.26     | 5.56  | 5.56 | 1.85  | 1.85  | 12.96 | 100   |
|       | 14.06 | 16.67 | 8.33  | 15.38 | 8.93     | 5.36  | 15   | 8.33  | 8.33  | 13.46 | 11.74 |
| 7     | 9     | 2     | 6     | 5     | 3        | 2     | 2    | 1     | 1     | 0     | 31    |
|       | 29.03 | 6.45  | 19.35 | 16.13 | 9.68     | 6.45  | 6.45 | 3.23  | 3.23  | 0     | 100   |
|       | 7.03  | 8.33  | 12.5  | 9.62  | 5.36     | 3.57  | 10   | 8.33  | 8.33  | 0     | 6.74  |
| 8     | 2     | 1     | 1     | 1     | 0        | 0     | 0    | 0     | 0     | 1     | 6     |
|       | 33.33 | 16.67 | 16.67 | 16.67 | 0        | 0     | 0    | 0     | 0     | 16.67 | 100   |
|       | 1.56  | 4.17  | 2.08  | 1.92  | 0        | 0     | 0    | 0     | 0     | 1.92  | 1.3   |
| 9     | 9     | 3     | 0     | 1     | 0        | 0     | 0    | 0     | 4     | 4     | 21    |
|       | 42.86 | 14.29 | 0     | 4.76  | 0        | 0     | 0    | 0     | 19.05 | 19.05 | 100   |
|       | 7.03  | 12.5  | 0     | 1.92  | 0        | 0     | 0    | 0     | 33.33 | 7.69  | 4.57  |
| 10    | 5     | 0     | 9     | 0     | 0        | 2     | 1    | 0     | 0     | 4     | 21    |
|       | 23.81 | 0     | 42.86 | 0     | 0        | 9.52  | 4.76 | 0     | 0     | 19.05 | 100   |
|       | 3.91  | 0     | 18.75 | 0     | 0        | 3.57  | 5    | 0     | 0     | 7.69  | 4.57  |
| Total | 128   | 24    | 48    | 52    | 56       | 56    | 20   | 12    | 12    | 52    | 460   |
|       | 27.83 | 5.22  | 10.43 | 11.3  | 12.17    | 12.17 | 4.35 | 2.61  | 2.61  | 11.3  | 100   |
|       | 100   | 100   | 100   | 100   | 100      | 100   | 100  | 100   | 100   | 100   | 100   |

## 2. Correlation matrix

Table 3.6: Incentivized revealed risk preferences (IRRP)

| Variable       | Partial<br>Corr. | Semipartial<br>Corr. | Partial<br>Corr.^2 | Semipartial<br>Corr.^2 | Significance<br>Value |
|----------------|------------------|----------------------|--------------------|------------------------|-----------------------|
| fin_literacy   | 0.1282***        | 0.1172               | 0.0164             | 0.0137                 | <b>0.0007</b>         |
| female         | 0.069*           | 0.0628               | 0.0048             | 0.0039                 | <b>0.0682</b>         |
| age            | 0.2312***        | 0.2156               | 0.0535             | 0.0465                 | <b>0.0000</b>         |
| urban          | -0.0963**        | -0.0877              | 0.0093             | 0.0077                 | <b>0.0109</b>         |
| lincome        | -0.0519          | -0.0471              | 0.0027             | 0.0022                 | 0.1709                |
| decisions      | -0.1113***       | -0.1016              | 0.0124             | 0.0103                 | <b>0.0032</b>         |
| household_size | -0.033           | -0.03                | 0.0011             | 0.0009                 | 0.3834                |
| PWTFR          | -0.0376          | -0.0341              | 0.0014             | 0.0012                 | 0.3208                |
| Risk tolerance | 0.33***          | 0.3171               | 0.1089             | 0.1006                 | <b>0.0000</b>         |

Standard errors in parentheses \*  $p < 0.10$ , \*\*  $p < 0.05$ , \*\*\*  $p < 0.01$

The study investigated the partial correlation between IRRP and other variables under consideration. IRRP was found to be positively significantly partially correlated with the variables; financial literacy, being female, age, and risk tolerance. Conversely, IRRP was found to be significantly negatively partially correlated with residing in the urban centers and participating in financial decision making. The study found an insignificant negative partial correlation between IRRP and PWTFR. The findings show that PWTFR cannot be used to represent individuals' IRRP since the variables are not significantly correlated. The results also suggest that individuals are more likely to understate or overstate the risk preferences when they complete the GRQ (PWTFR) in a survey.

The study also explored the correlation between risk tolerance (the individual gap between IRRP and PWTFR choices) with other variables under consideration (Table 3). The results show that financial literacy is significantly and negatively partially correlated with risk tolerance. Showing that higher financial literacy is associated with low risk tolerance gap. In addition, risk tolerance was found to be significantly and positively partially correlated with IRRP, being female and the household size. The risk tolerance gap could be explained precisely by IRRP whereas PWTFR was found to be insignificantly and negatively correlated with risk tolerance. The finding reveals that when the subject made risk preference under PWTFR they were casual and their responses did not correlate with their financial knowledge. The study results contradict the findings by Dohmen et al (2011) they concluded that the GRQ is significantly correlated with field elicited risk preferences. On the other hand, this study corroborates findings by studies that could not find a significant correlation between GRQ and incentivized elicited risk preferences (Csermely and Rabas, 2016; Lönnqvist et al., 2015).

Table 3.7: Risk tolerance (RT) gap

| Variable       | Partial<br>Corr. | Semipartial<br>Corr. | Partial<br>Corr.^2 | Semipartial<br>Corr.^2 | Significance<br>Value |
|----------------|------------------|----------------------|--------------------|------------------------|-----------------------|
| fin_literacy   | -0.1759***       | -0.1647              | 0.0309             | 0.0271                 | <b>0.0000</b>         |
| female         | 0.0747**         | 0.0691               | 0.0056             | 0.0048                 | <b>0.0484</b>         |
| age            | 0.013            | 0.012                | 0.0002             | 0.0001                 | 0.7319                |
| urban          | 0.062            | 0.0572               | 0.0038             | 0.0033                 | 0.1017                |
| lincome        | -0.0181          | -0.0167              | 0.0003             | 0.0003                 | 0.6329                |
| decisions      | 0.0314           | 0.029                | 0.001              | 0.0008                 | 0.4071                |
| household_size | 0.0724**         | 0.067                | 0.0052             | 0.0045                 | <b>0.0556</b>         |
| IRRP           | 0.33***          | 0.3223               | 0.1089             | 0.1039                 | <b>0.0000</b>         |
| PWTFR          | -0.0129          | -0.0119              | 0.0002             | 0.0001                 | 0.7339                |

Standard errors in parentheses \*  $p < 0.10$ , \*\*  $p < 0.05$ , \*\*\*  $p < 0.01$

## APPENDIX A

Appendix A provides further graphical analysis and t-test analysis of risk preference choices made by subjects across IRRP and PWTFR risk preference eliciting methods.

### PWTFR graphs by gender and by financial literacy level

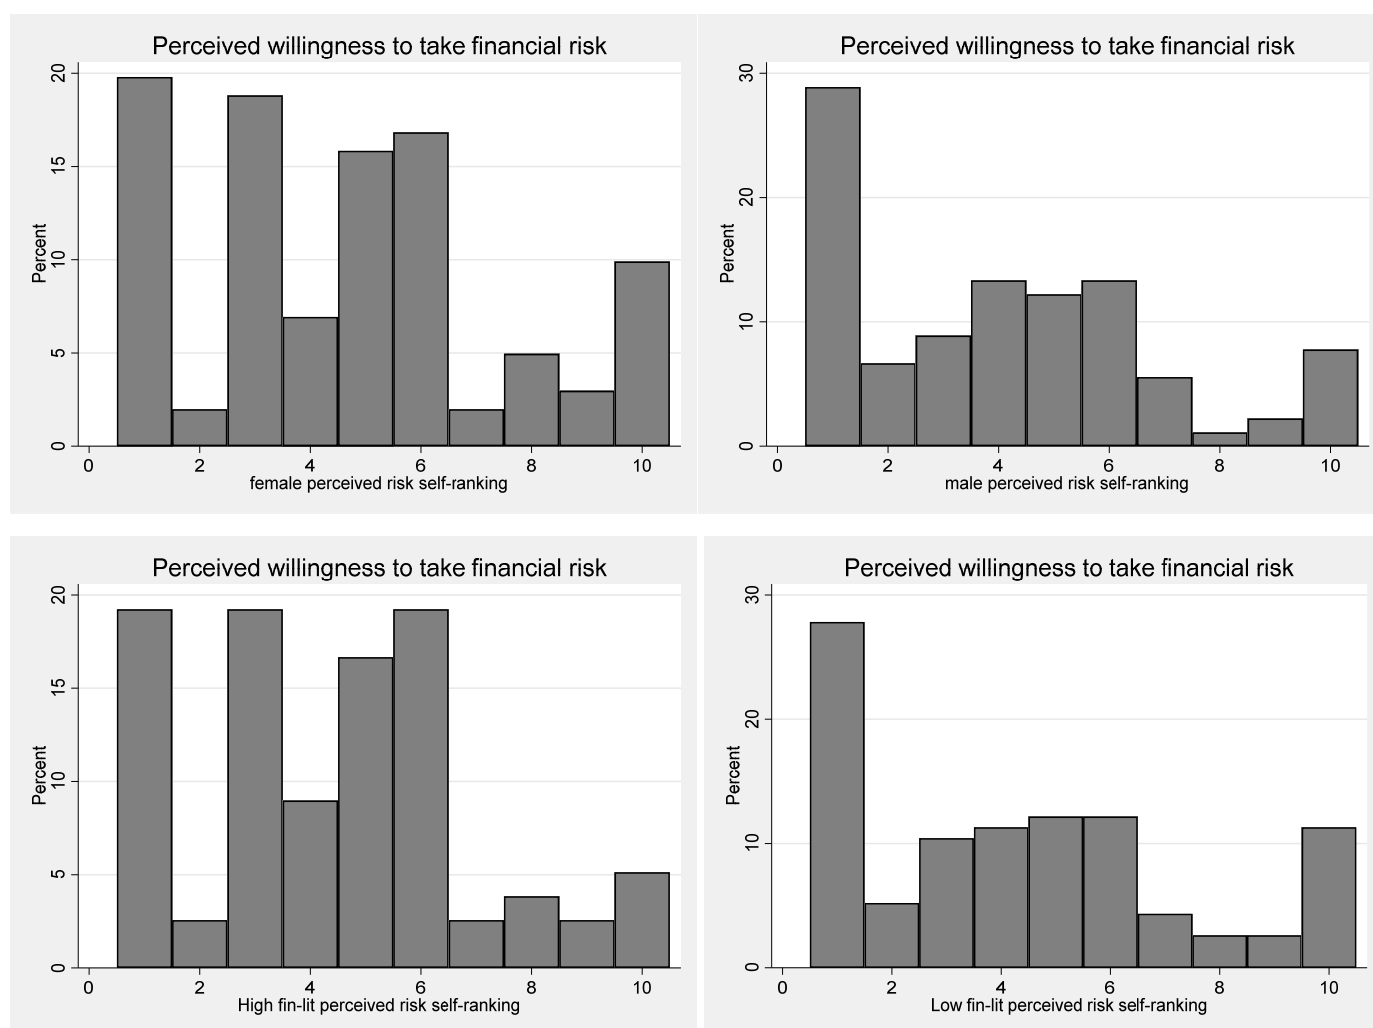

**Figure 3. 1:** Perceived willingness to take financial risk graphs, show percentage of self-reported PWTFR rankings made by the respondents on a 10 point Likert Scale by gender and by financial literacy level. Perceived risk self-ranking 'bar graph 1' shows subjects who self-reported that they are 'very willing' to take financial risk in the investments while 'bar graph 10' show percentage of subjects 'not willing' to take financial risk.



### IRRP graphs by gender and by financial literacy level

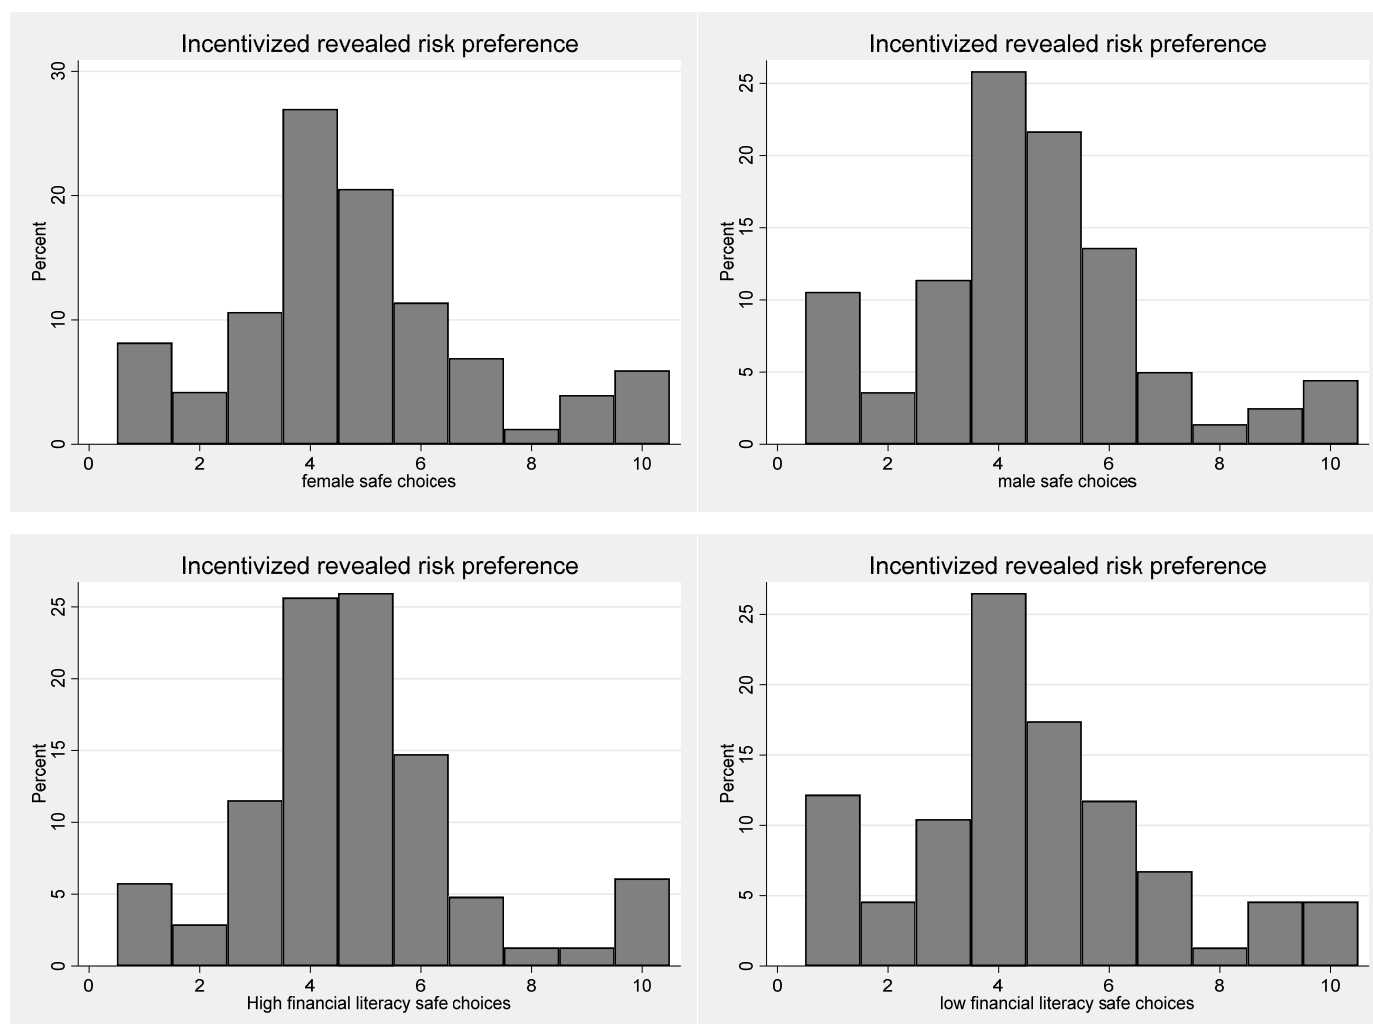

**Figure 3.2:** The incentivized revealed risk preference (IRRP) graphs show percentage of respondents by the number of safe choices. Subjects who made a single safe choice are highly risk loving 'bar graph 1' while those that made ten safe choices 'bar graph 10' are highly risk averse.

### T-TEST analysis

**Table 3.8: Paired t-test PWTFR and IRRP**

| Variable                      | observation | mean                | Std. Err. | Std. Dev               | [95% Con. Inter] |
|-------------------------------|-------------|---------------------|-----------|------------------------|------------------|
| PWTFR                         | 772         | 4.3782              | 0.10      | 2.78                   | 4.18 - 4.57      |
| IRRP                          | 772         | 4.696               | 0.08      | 2.19                   | 4.54 - 4.85      |
| diff                          | 772         | -0.32               | 0.13      | 3.63                   | -0.58 - -0.06    |
| Mean(diff)=mean (PWTFR-IRRP)  |             |                     |           | t=-2.44                |                  |
| H <sub>0</sub> : mean(diff)=0 |             |                     |           | Degrees of freedom=771 |                  |
| Ha: mean(diff) < 0            |             | Ha: mean(diff) != 0 |           | Ha: mean(diff) > 0     |                  |
| Pr(T < t) = 0.01              |             | Pr(T > t) = 0.02    |           | Pr(T > t) = 0.99       |                  |

**Table 3.9: t-test analysis PWTFR by gender.**

| Group                         | observation | mean                | Std. Err. | Std. Dev               | [95% Con .Inter] |
|-------------------------------|-------------|---------------------|-----------|------------------------|------------------|
| male                          | 360         | 4.09                | 0.15      | 3.80                   | 3.80– 4.38       |
| female                        | 404         | 4.67                | 0.14      | 2.78                   | 4.40 – 4.95      |
| Combined                      | 764         | 4.40                | 0.10      | 2.79                   | 4.20–4.6         |
| diff                          |             | -0.23               | 0.20      |                        | -0.98 - -0.19    |
| Mean(diff)=mean (PWTFR-IRRP)  |             |                     |           | t=-2.91                |                  |
| H <sub>0</sub> : mean(diff)=0 |             |                     |           | Degrees of freedom=762 |                  |
| Ha: mean(diff) < 0            |             | Ha: mean(diff) != 0 |           | Ha: mean(diff) > 0     |                  |
| Pr(T < t) = 0.00              |             | Pr(T > t) = 0.00    |           | Pr(T > t) = 0.998      |                  |

**Table 3.10: t-test analysis IRRP by gender**

| Group                         | observation | mean                | Std. Err. | Std. Dev               | [95% Con .Inter] |
|-------------------------------|-------------|---------------------|-----------|------------------------|------------------|
| male                          | 360         | 4.58                | 0.11      | 2.13                   | 4.36 – 4.80      |
| female                        | 404         | 4.81                | 0.11      | 2.23                   | 4.59 – 5.03      |
| Combined                      | 764         | 4.70                | 0.08      | 2.19                   | 4.55–4.86        |
| diff                          |             | -0.23               | 0.16      |                        | -0.54 - 0.09     |
| Mean(diff)=mean (PWTFR-IRRP)  |             |                     |           | t=-1.43                |                  |
| H <sub>0</sub> : mean(diff)=0 |             |                     |           | Degrees of freedom=762 |                  |
| Ha: mean(diff) < 0            |             | Ha: mean(diff) != 0 |           | Ha: mean(diff) > 0     |                  |
| Pr(T < t) = 0.07              |             | Pr(T > t) = 0.15    |           | Pr(T > t) = 0.92       |                  |

**Table 3.11: t-test analysis, PWTFR by financial literacy level**

| Group                         | observation | mean                | Std. Err. | Std. Dev               | [95% Con .Inter] |
|-------------------------------|-------------|---------------------|-----------|------------------------|------------------|
| Low fin literacy              | 460         | 4.37                | 0.14      | 2.97                   | 4.09 – 4.64      |
| High fin literacy             | 312         | 4.40                | 0.14      | 2.48                   | 4.12 – 4.67      |
| Combined                      | 772         | 4.38                | 0.10      | 2.78                   | 4.18–4.57        |
| diff                          |             | -0.03               | 0.20      |                        | -0.43 - 0.37     |
| Mean(diff)=mean (PWTFR-IRRP)  |             |                     |           | t=-1.43                |                  |
| H <sub>0</sub> : mean(diff)=0 |             |                     |           | Degrees of freedom=770 |                  |
| Ha: mean(diff) < 0            |             | Ha: mean(diff) != 0 |           | Ha: mean(diff) > 0     |                  |
| Pr(T < t) = 0.44              |             | Pr(T > t) = 0.87    |           | Pr(T > t) = 0.56       |                  |

**Table 3.12: t-test analysis, IRRP by financial literacy level**

| Group                         | observation | mean                | Std. Err. | Std. Dev               | [95% Con .Inter] |
|-------------------------------|-------------|---------------------|-----------|------------------------|------------------|
| Low fin literacy              | 460         | 4.60                | 0.11      | 2.30                   | 4.39 – 4.81      |
| High fin literacy             | 312         | 4.83                | 0.11      | 2.02                   | 4.61 – 5.06      |
| Combined                      | 772         | 4.70                | 0.08      | 2.19                   | 4.54–4.86        |
| diff                          |             | -0.23               | 0.16      |                        | -0.54 - 0.09     |
| Mean(diff)=mean (PWTFR-IRRP)  |             |                     |           | t=-1.43                |                  |
| H <sub>0</sub> : mean(diff)=0 |             |                     |           | Degrees of freedom=770 |                  |
| Ha: mean(diff) < 0            |             | Ha: mean(diff) != 0 |           | Ha: mean(diff) > 0     |                  |
| Pr(T < t) = 0.08              |             | Pr(T > t) = 0.15    |           | Pr(T > t) = 0.92       |                  |
